# Supplementary material
Source: HighWire-hosted journal article supplement (https://www.highwirestage.com/highwire/filestream/90247/field_highwire_adjunct_files/0/1512.pdf)
Supplement: 1512.pdf [file 1512.pdf]

A

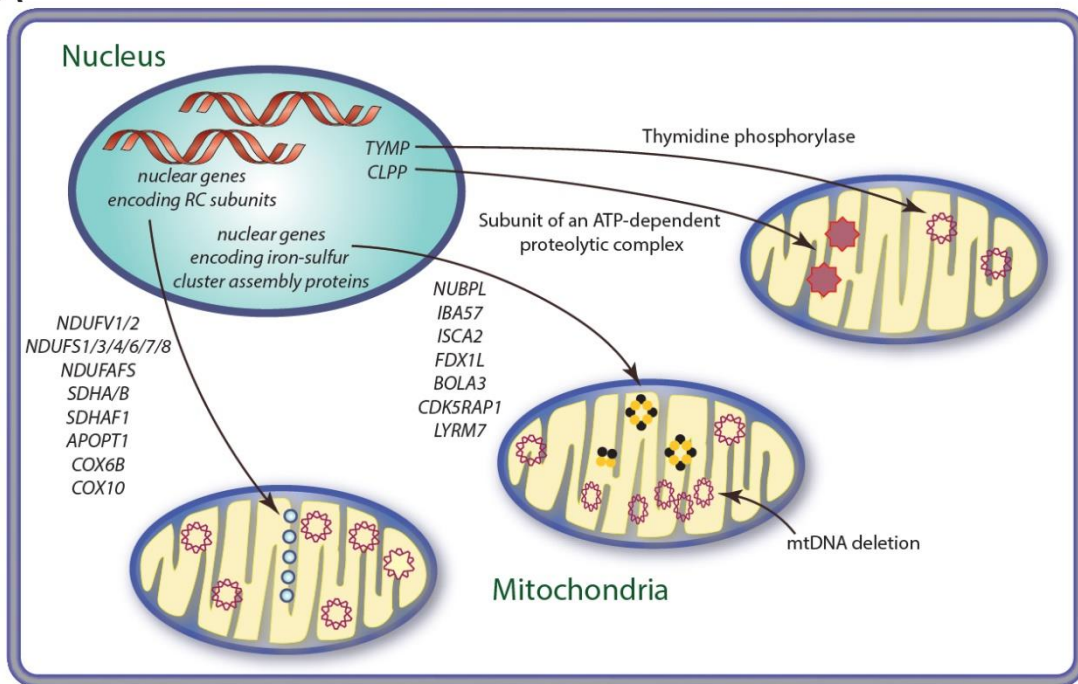

B

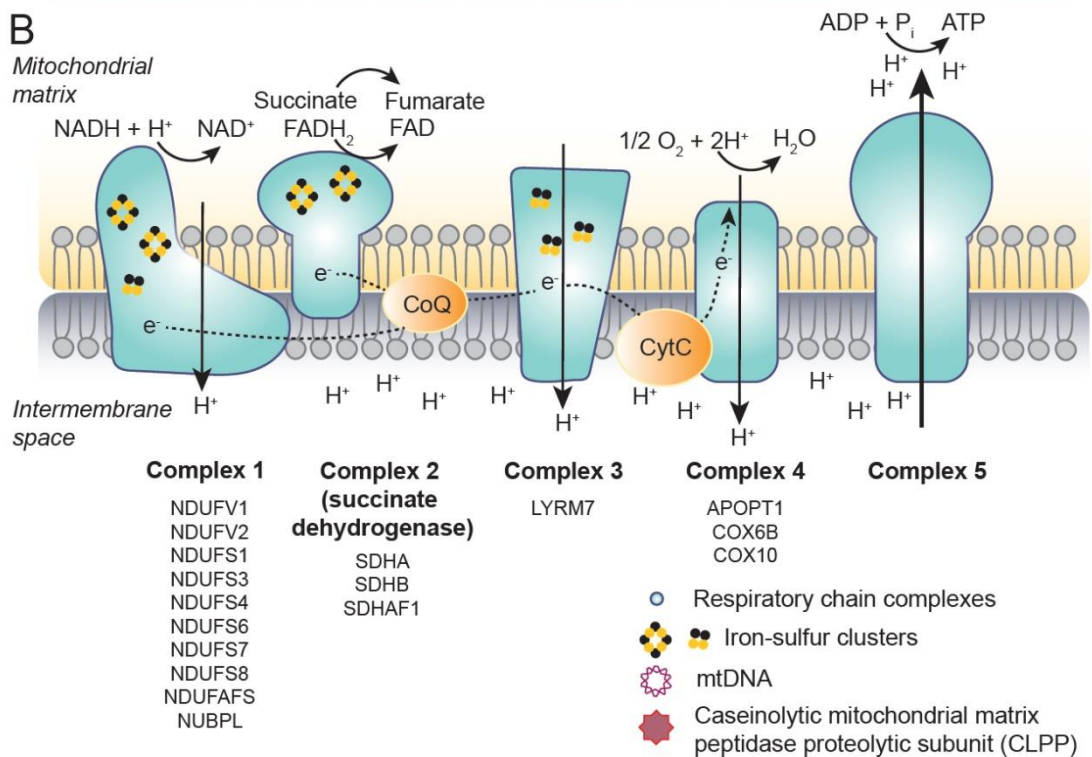

A) Overview of the different genes encoding subunits of respiratory chain (RC) complexes, proteins involved in iron-sulfur cluster biogenesis, CLPP and thymidine phosphorylase. (B) Schematic view of the respiratory chain, including the genes in which variations were found in this study. CoQ: coenzyme Q, CytC: cytochrome C. This Figure is an original image created by dr. N.I. Wolf, Amsterdam UMC.
